# Supplementary figures and images for: Nonviral Gene Delivery of Growth and Differentiation Factor 5 to Human Mesenchymal Stem Cells Injected into a 3D Bovine Intervertebral Disc Organ Culture System
Source: Hindawi journal article supplement (doi:10.1155/2013/326828), 2013-01-01

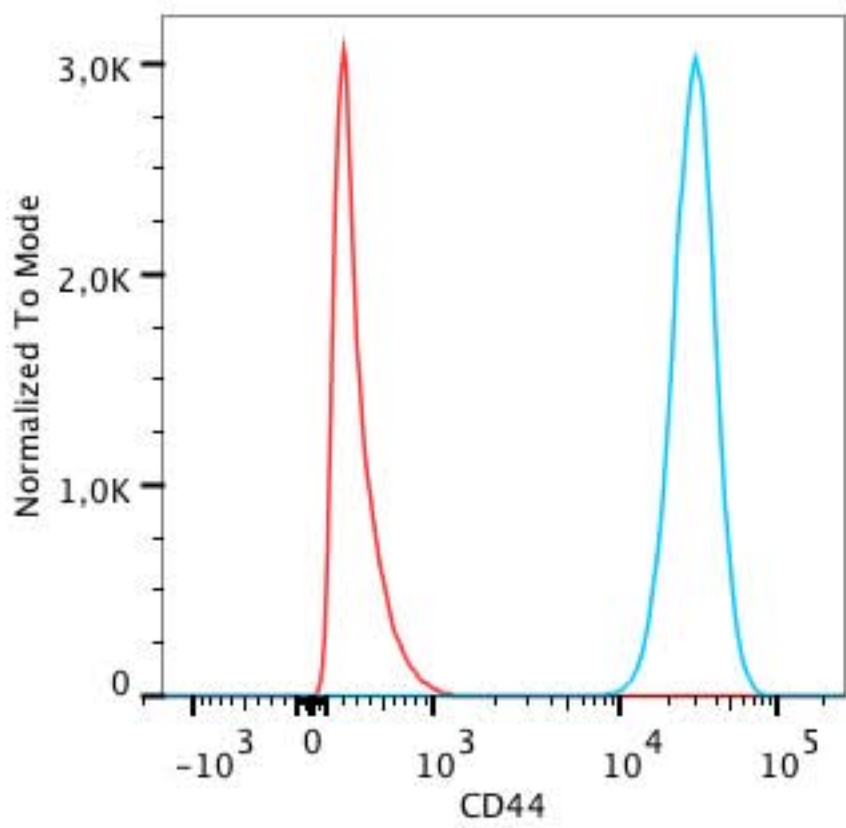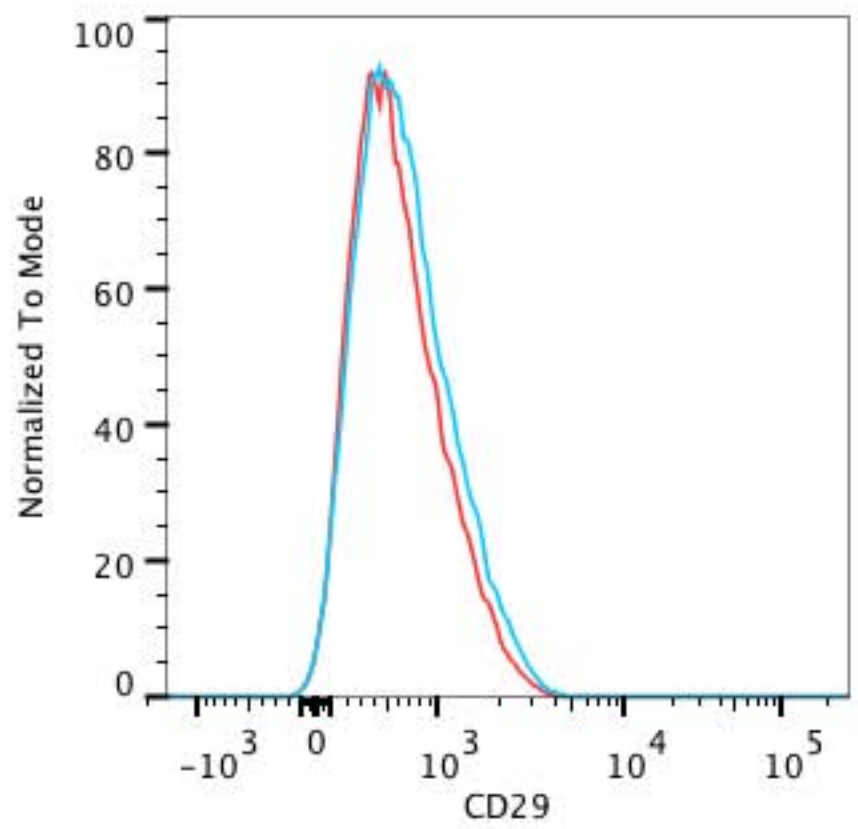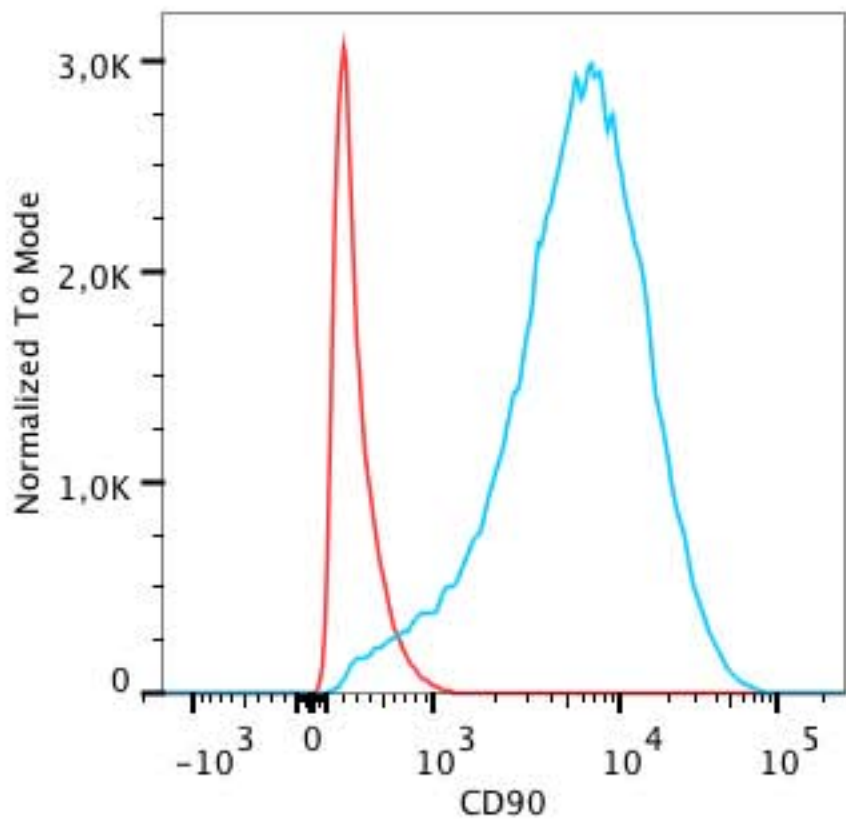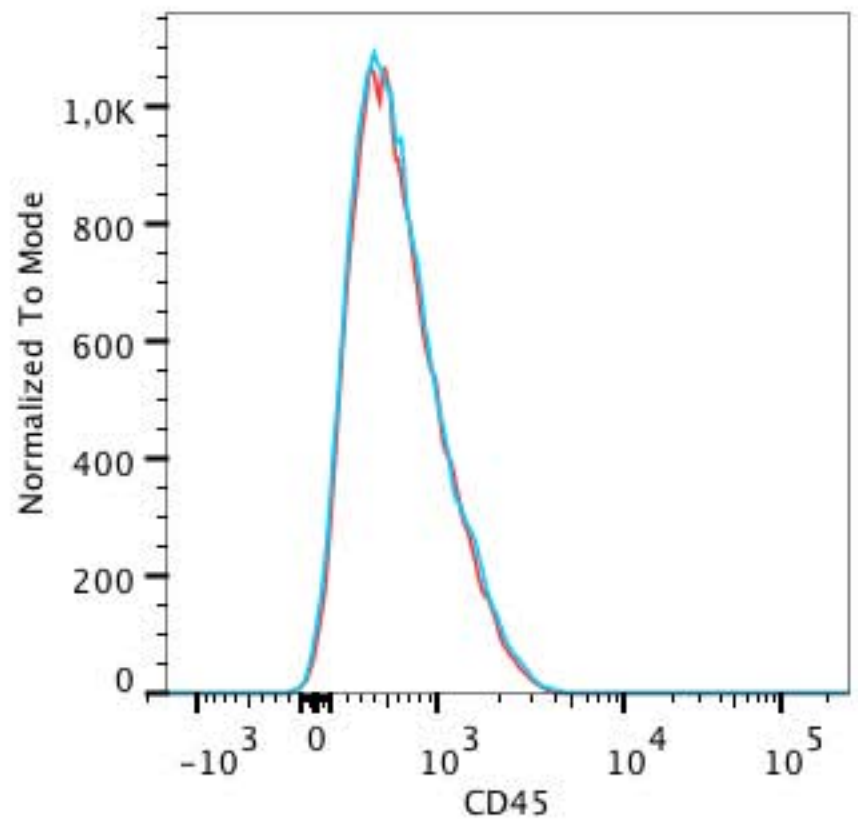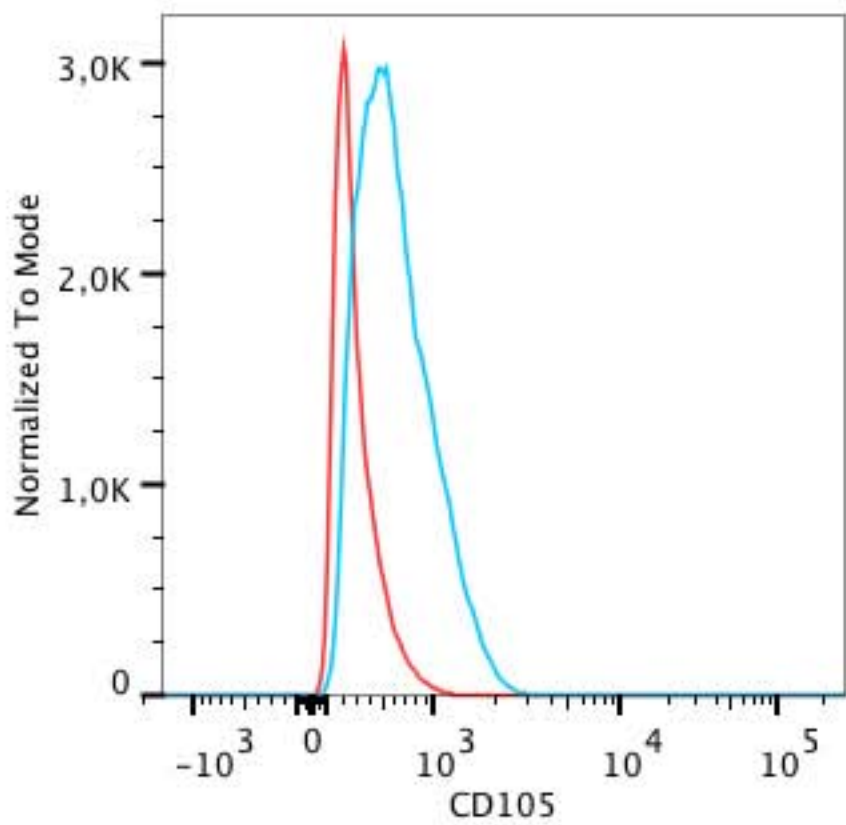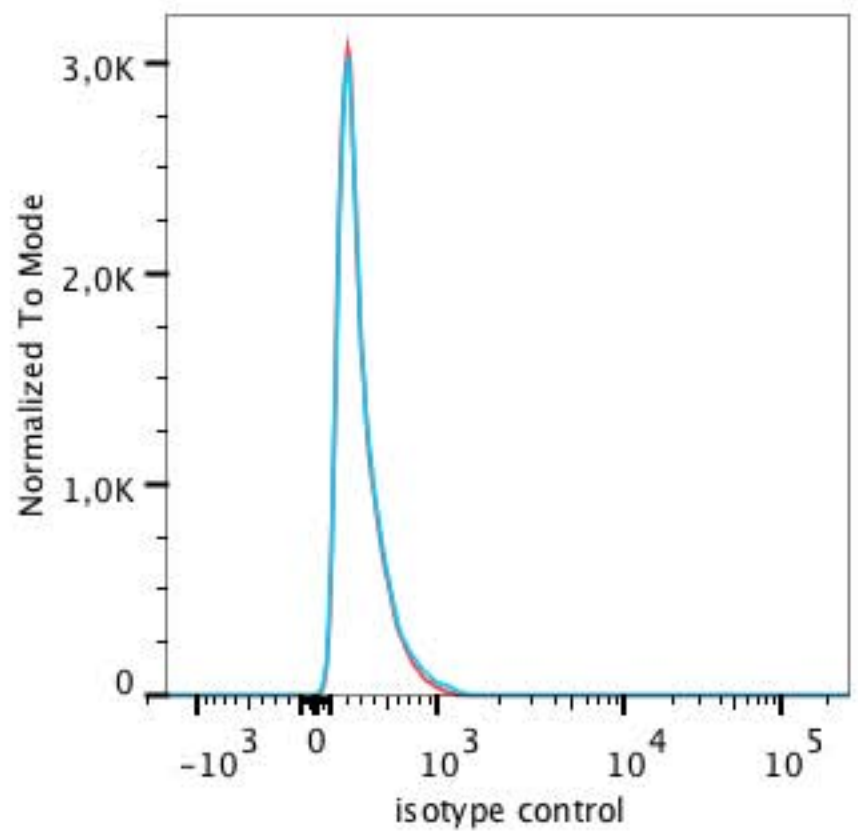

Supplement: f1 [file 326828.f1.pdf]
